# Supplementary figures and images for: The Effect of Alendronate on Osteoclastogenesis in Different Combinations of M-CSF and RANKL Growth Factors
Source: MDPI journal article supplement (doi:10.3390/biom11030438), 2021-03-16

**A** DNA quantification - rPBMCs

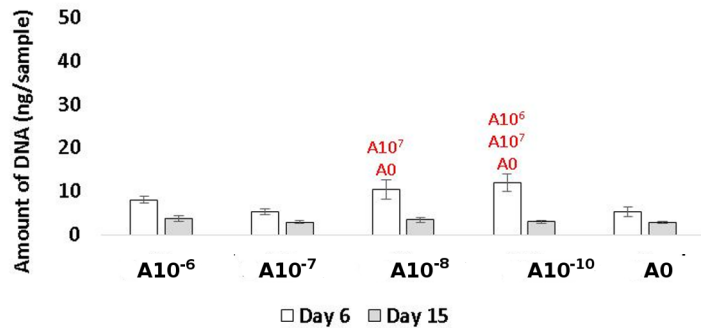

**B** DNA quantification - rPBMCs

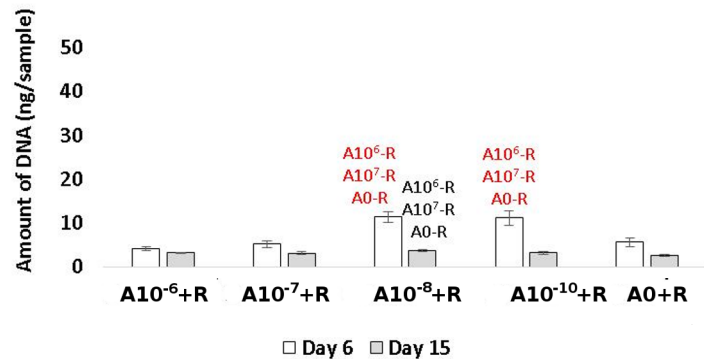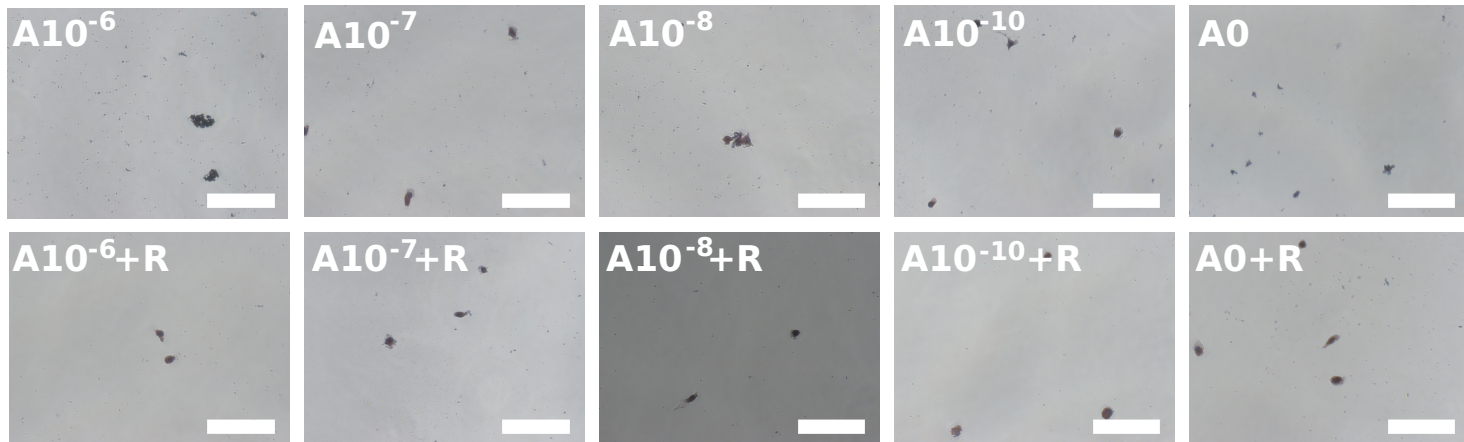

Supplement: s1 [file s1]

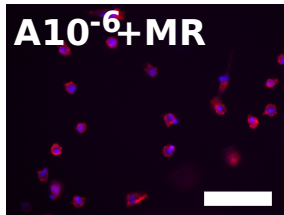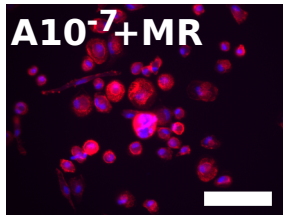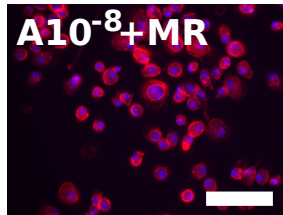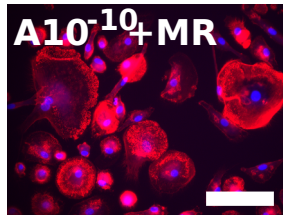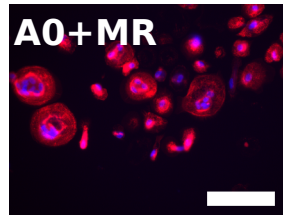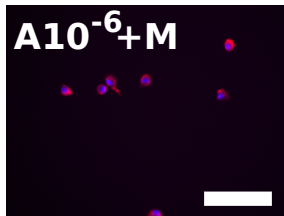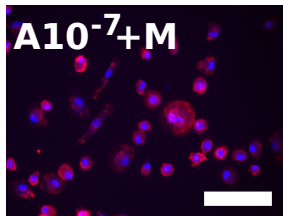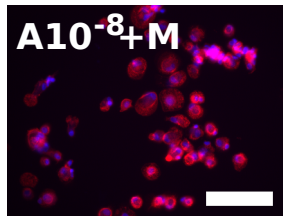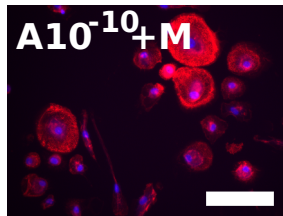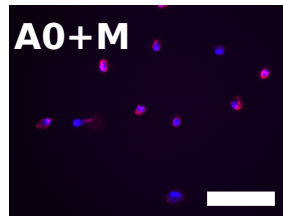

Supplement: s1 [file s1]
